# Supplementary material for: Metal-doped black In2O3 for atmospheric-pressure photothermal CO2 reduction with high efficiency and selectivity
Source: Royal Society of Chemistry journal article supplement (doi:10.1039/d4cy00382a), 2024-01-01
Supplement: d4cy00382a1.pdf [file d4cy00382a1.pdf]

**Metal doped black In<sub>2</sub>O<sub>3</sub> for atmospheric pressure CO<sub>2</sub> photothermal reduction  
with high efficiency and selectivity**

Yang Yang<sup>a,b,1,\*</sup>, Liqiang Zhang<sup>b,1</sup>, Jiaben Wang<sup>a</sup>, Hao Song<sup>a</sup>, Xiao Zhang<sup>a</sup>, Xiang  
Gao<sup>a,b,\*</sup>

<sup>a</sup>State Key Laboratory of Clean Energy Utilization, Zhejiang University, Hangzhou  
310027, PR China

<sup>b</sup>Institute of Carbon Neutrality, Zhejiang University, Hangzhou 310027, PR China

\*Corresponding Authors

<sup>1</sup>Co-first authors

### DFT calculations

Spin-polarized DFT calculations were performed using the Vienna ab initio simulation package (VASP).<sup>1,2</sup> The generalized gradient approximation proposed by Perdew, Burke, and Ernzerhof (GGA-PBE) is selected for the exchange-correlation potential.<sup>3</sup> The pseudo-potential was described by the projector-augmented-wave (PAW) method.<sup>4</sup> To accurately describe the dispersion interaction, we use DFT-D3 method with Becke-Jonson damping for dispersion correction.<sup>5</sup> The geometry optimization was performed until the Hellmann–Feynman force on each atom is smaller than 0.02 eV·Å<sup>-1</sup>. The energy criterion was set to 10<sup>-4</sup> eV in the iterative solution of the Kohn-Sham equation. The Brillouin zone was sampled with 2×2×1 Monkhorst-Pack k-point mesh, and a Gaussian smearing of 0.05 eV was applied to speed up electronic convergence. Based on a computational hydrogen electrode (CHE) model proposed by Nørskov and co-workers,<sup>6,7</sup> the Gibbs reaction free energy ( $\Delta G$ ) for CO<sub>2</sub> reduction was defined as,

$$\Delta G = \Delta E + \Delta ZPE - T\Delta S$$

where  $\Delta E$  is the change of electronic energy,  $\Delta ZPE$  is the change of zero point energy,  $T$  is the system temperature (298.15 K),  $\Delta S$  is the change of entropy, respectively. Under the potential of 0 V vs. RHE, the CHE method relates the chemical of proton-

electron pairs ( $H^+ + e^-$ ) as  $1/2 H_2$  (g). A vacuum height of 15 Å along the vertical direction was selected to avoid the unwanted interaction between the slab and its period images.

The dimension of the optimized cubic  $In_2O_3$  model consist of 72 O atoms and 48 In atoms, and the  $Cu-In_2O_{3-x}$  model consist of 65 O atoms, 48 In atoms and 3 Cu atoms. distributed in three In-O-In tri-layers. In the calculation, the oxygen vacancy near the Cu atom is used as the active site for the  $Cu-In_2O_{3-x}$  system, and In is used as the active site for the  $In_2O_3$  system.

1. G. Kresse, J. Hafner, Phys. Rev. 1993, 47, 558.
2. G. Kresse, J. Furthmuller, Phys. Rev. 1996, 54, 11169.
3. J. P. Perdew, K. Burke, Phys., Rev. Lett. 1996, 77, 3865.
4. P. E. Blöchl, Phys. Rev. B 1994, 50, 17953.
5. S. Grimme, S. Ehrlich, L. Goerigk. J. Comput. Chem. 2011, 32, 1456.
6. R. A. Alberty, J. Biol. Chem., 1969, 244, 3290-3302.
7. J. Rossmeisl, J. K. Nørskov, C. D. Taylor, M. J. Janik, M. Neurock, J. Phys. Chem. B, 2006, 110, 21833-21839.

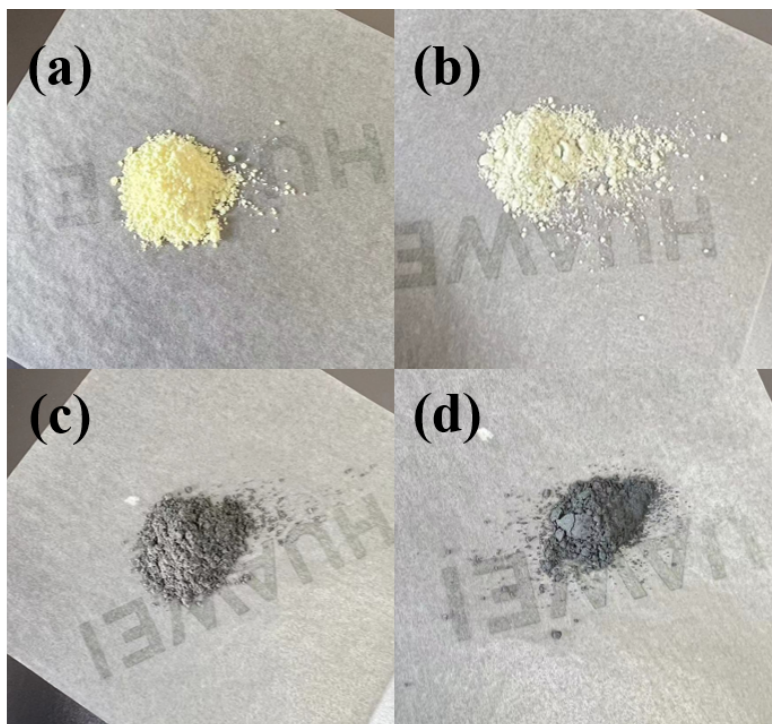

**Fig. S1** Digital pictures of  $\text{In}_2\text{O}_{3-x}$  treated with  $\text{H}_2$  at (a)  $25^\circ\text{C}$ , (b)  $200^\circ\text{C}$ , (c)  $300^\circ\text{C}$  and (d)  $400^\circ\text{C}$ .

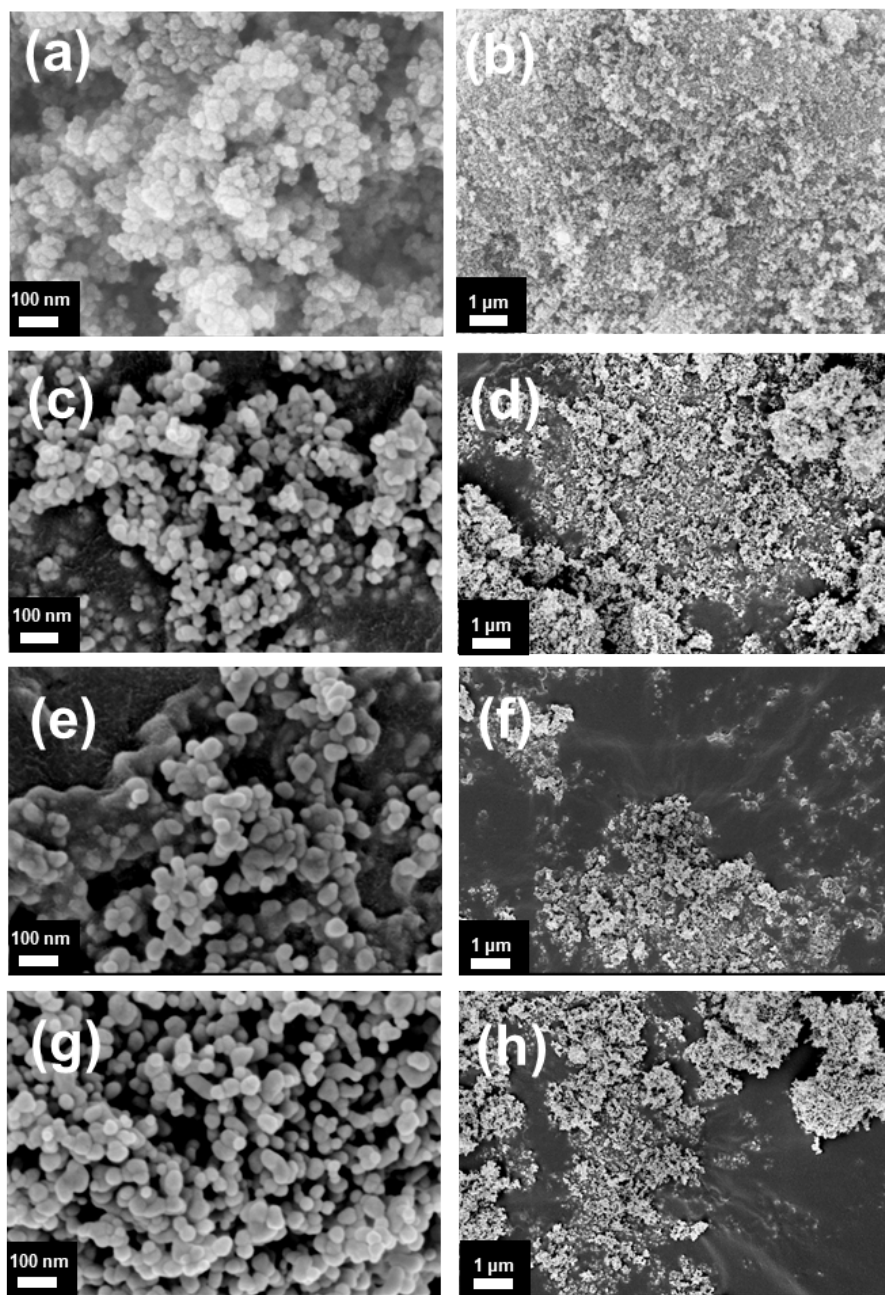

**Fig. S2** SEM images of  $\text{In}_2\text{O}_{3-x}$  treated with  $\text{H}_2$  at (a-b) 25°C, (c-d) 200°C, (e-f) 300°C and (g-h) 400°C.

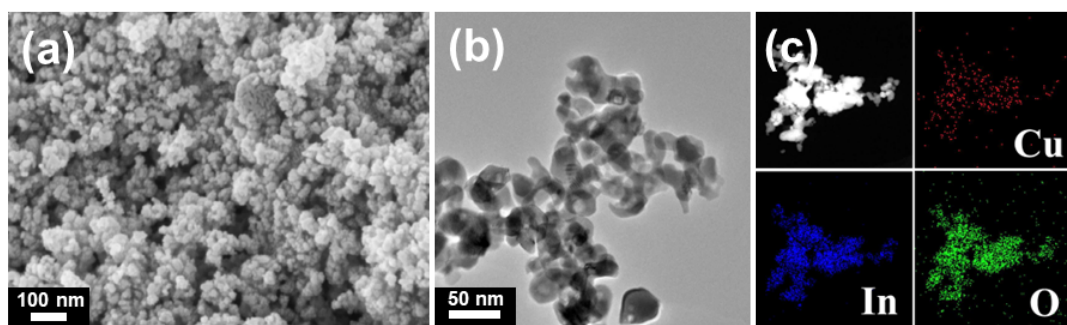

**Fig. S3** (a) SEM image of  $\text{Cu-In}_2\text{O}_{3-x}$ . (b) and (c) are TEM and the corresponding mapping images of  $\text{Cu-In}_2\text{O}_{3-x}$ .

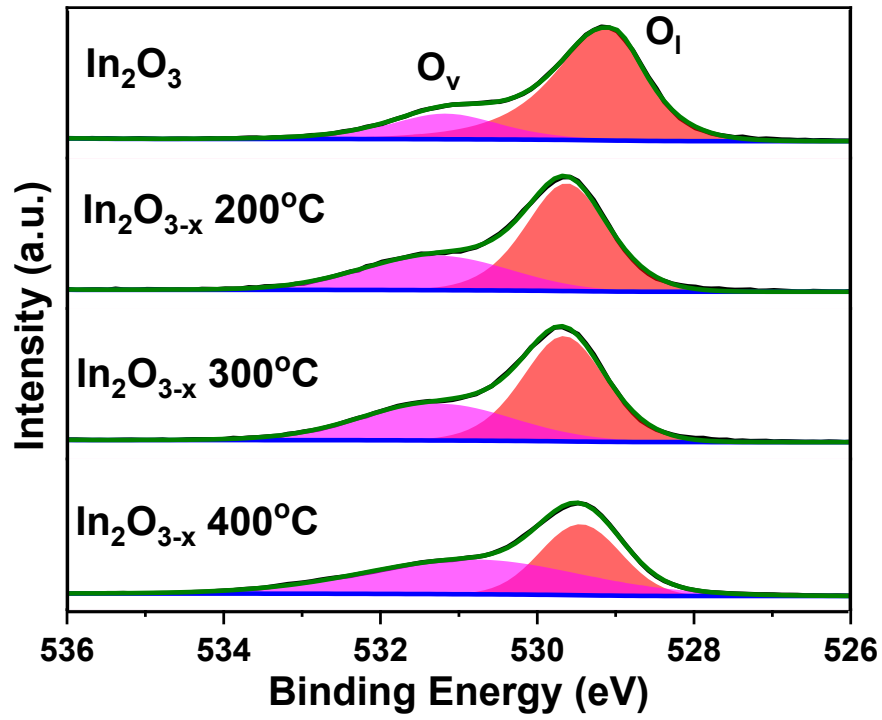

**Fig. S4** XPS spectra of O 1s of  $\text{In}_2\text{O}_{3-x}$  treated with  $\text{H}_2$  at different temperatures.

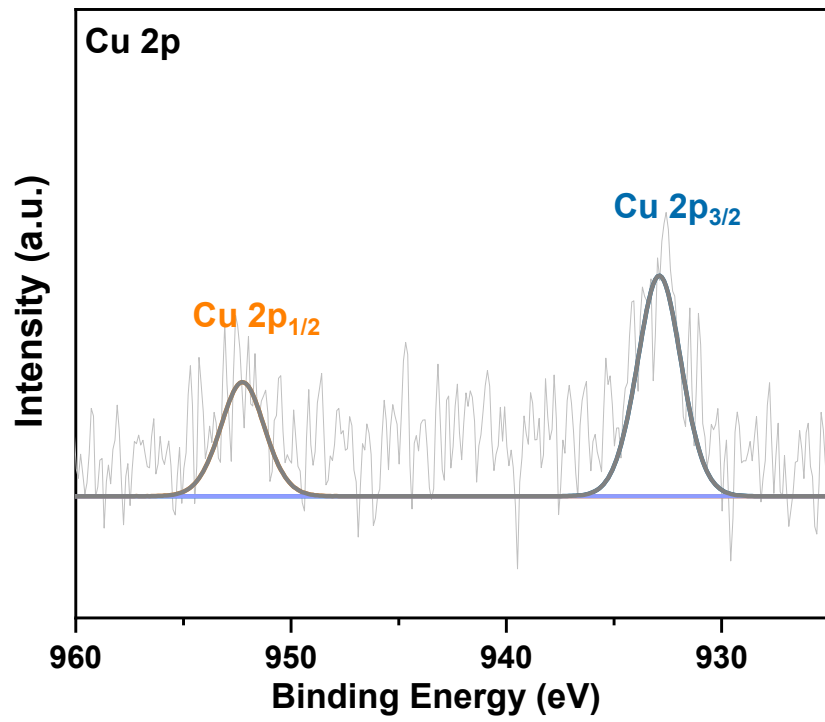

**Fig. S5** XPS spectra of Cu 2p of Cu-In<sub>2</sub>O<sub>3-x</sub>.

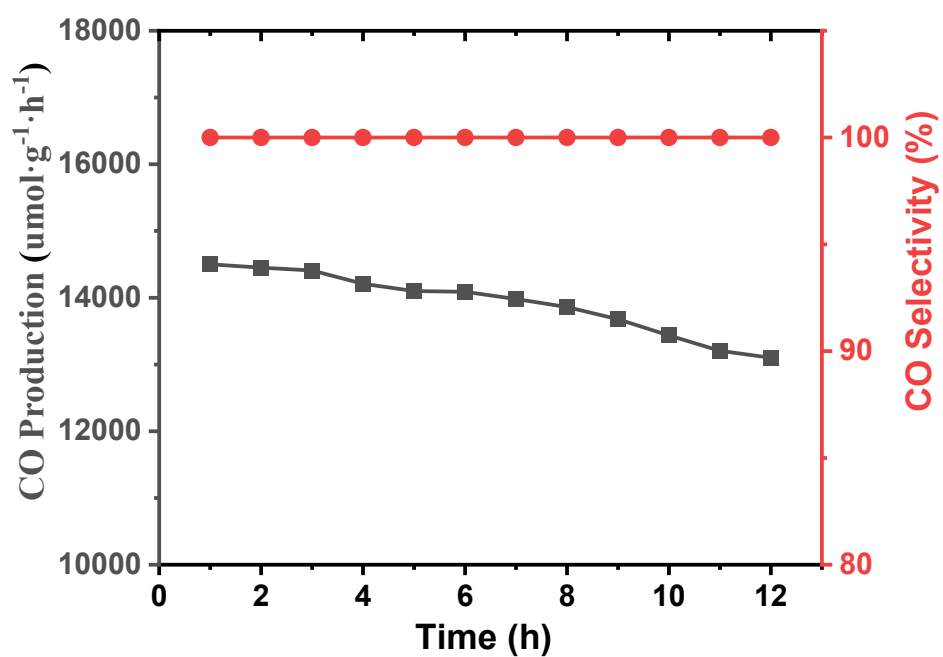

**Fig. S6** CO yield and selectivity of Cu-In<sub>2</sub>O<sub>3-x</sub> at 300°C for 12 h.



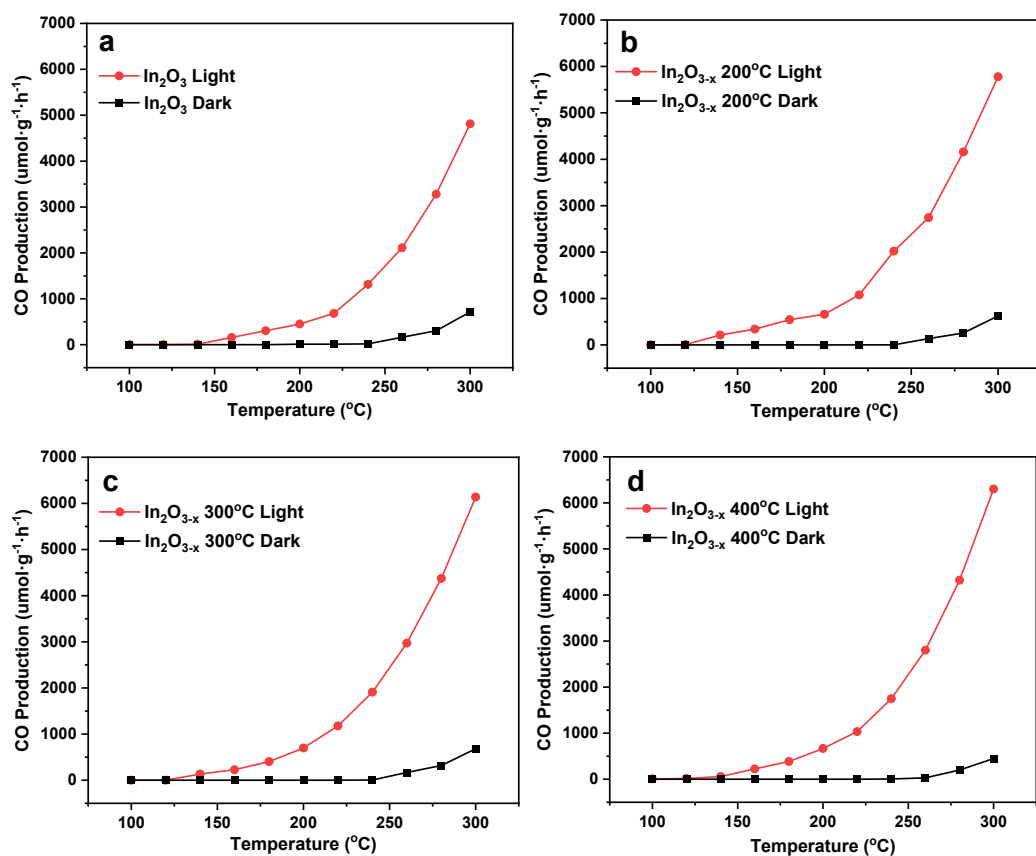

**Fig. S7** Comparison of photothermal and thermal catalytic activities of  $\text{In}_2\text{O}_{3-x}$  treated with  $\text{H}_2$  at (a) 25°C, (b) 200°C, (c) 300°C, (d) 400°C.

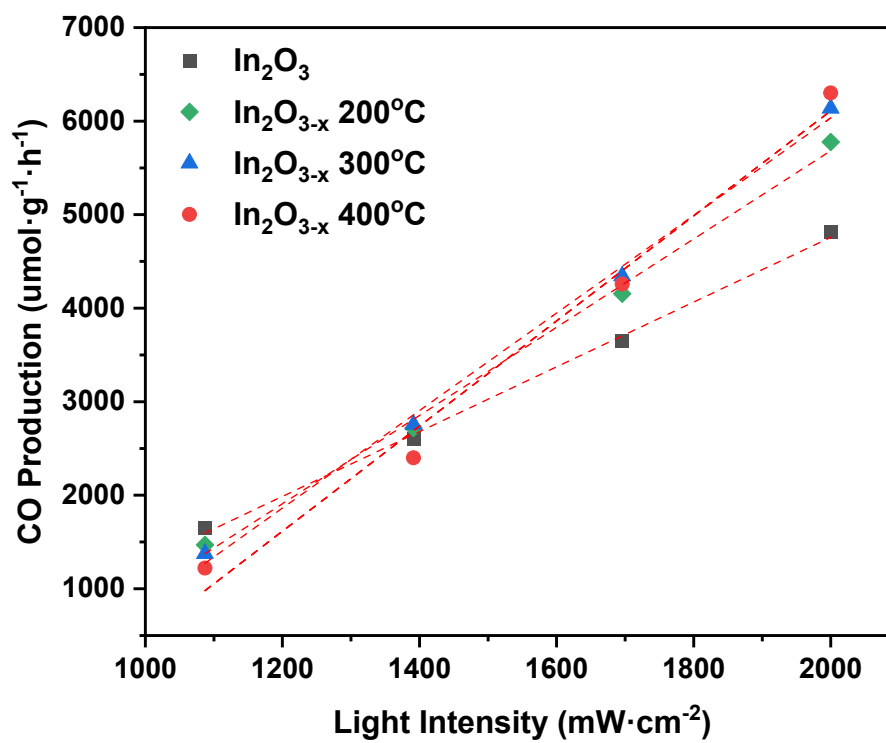

**Fig. S8** Photothermal catalytic performance of In<sub>2</sub>O<sub>3-x</sub> treated with H<sub>2</sub> at different temperatures at reaction temperature of 300°C.

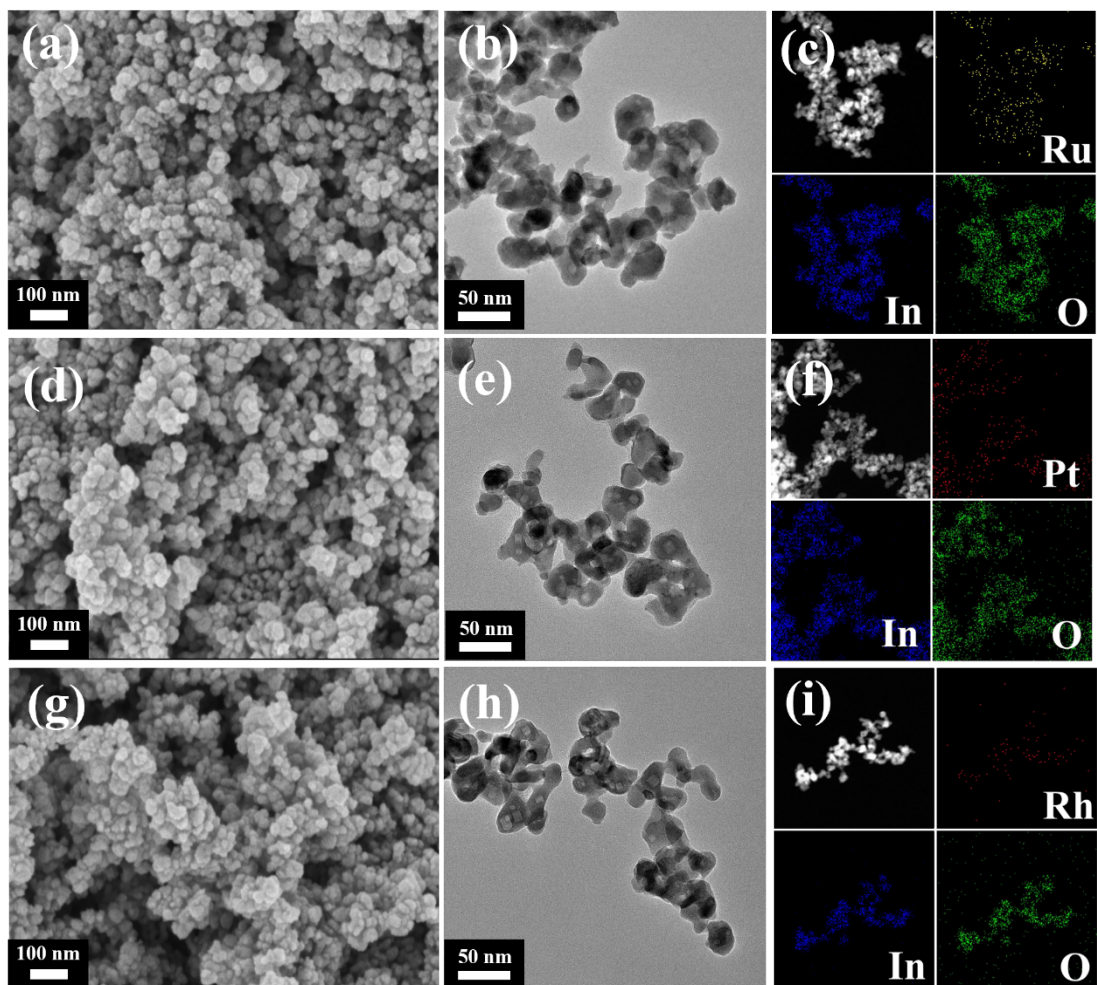

**Fig. S9** (a) SEM image of Ru-In<sub>2</sub>O<sub>3-x</sub>, (b) and (c) are TEM and the corresponding mapping images. (d) SEM image of Pt-In<sub>2</sub>O<sub>3-x</sub>, (e) and (f) are TEM and the corresponding mapping images. (g) SEM image of Rh-In<sub>2</sub>O<sub>3-x</sub>, (h) and (i) are TEM and the corresponding mapping images.

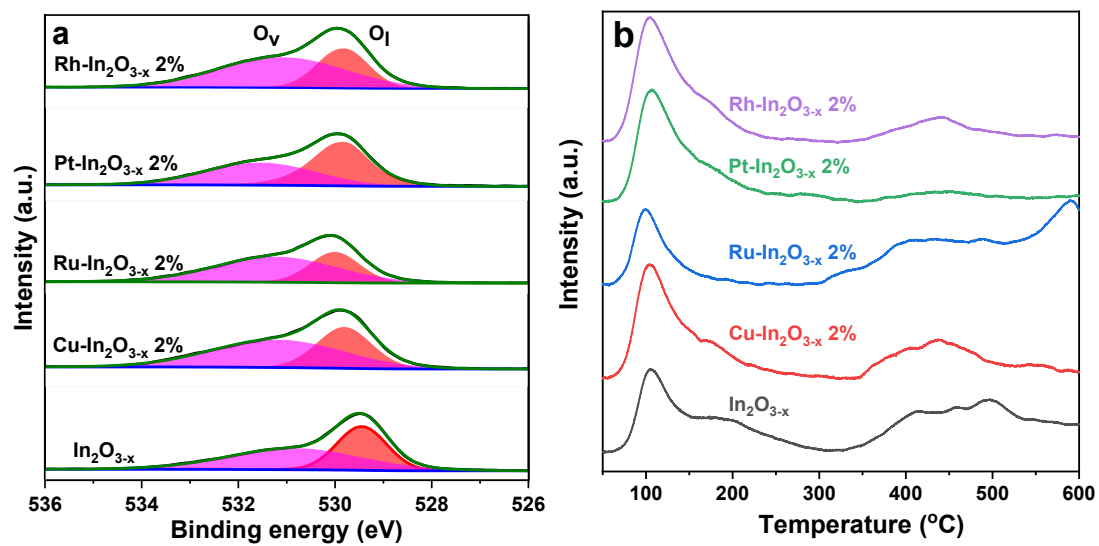

**Fig. S10** (a) XPS spectra of O 1s of In<sub>2</sub>O<sub>3-x</sub> doped with different metals. (b) CO<sub>2</sub>-TPD spectra of different metal doped In<sub>2</sub>O<sub>3-x</sub>.

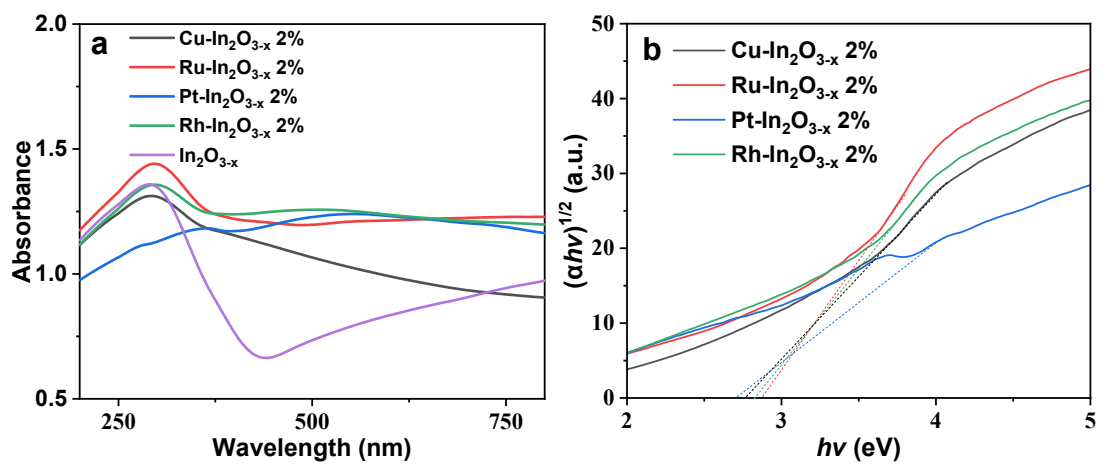

**Fig. S11** UV-visible diffuse reflectance spectrums (a) and band gap (b) of different metal doped  $\text{In}_2\text{O}_{3-x}$ .

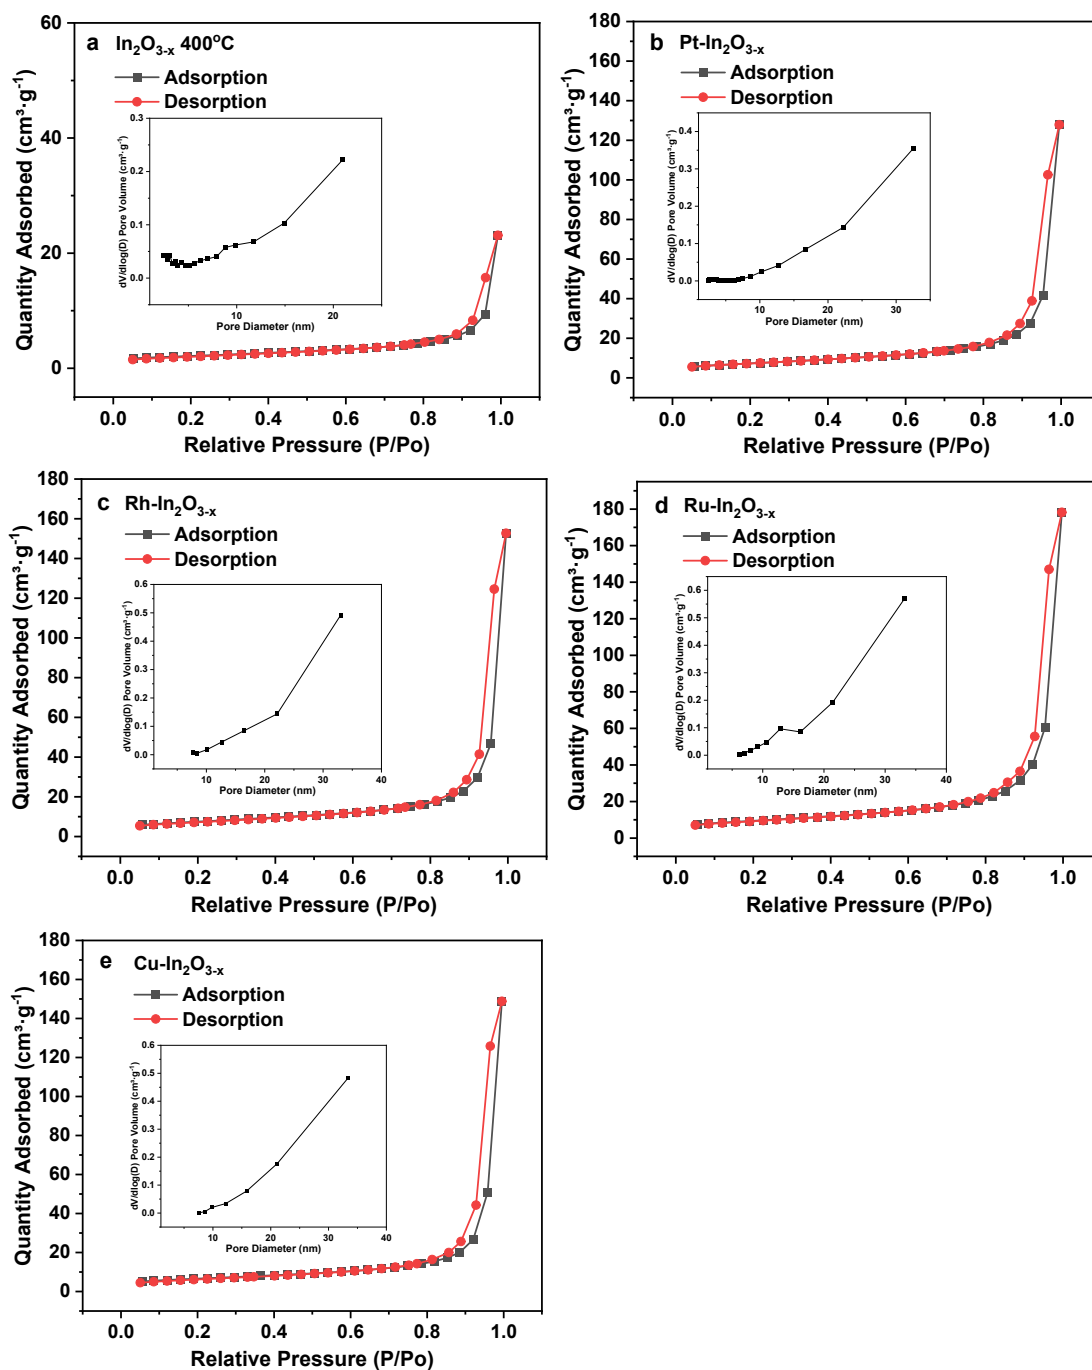

Fig. S12  $\text{N}_2$  adsorption-desorption curves of different metal doped  $\text{In}_2\text{O}_{3-x}$ .

**Table S1** Specific surface area, pore characteristics and loading capacity of catalysts.

| Samples                                | S <sub>BET</sub><br>(m <sup>2</sup> /g) | Pore volume<br>(cm <sup>3</sup> /g) | Pore diameter<br>(nm) | Loading<br>(%) |
|----------------------------------------|-----------------------------------------|-------------------------------------|-----------------------|----------------|
| In <sub>2</sub> O <sub>3-x</sub> 400°C | 7.31                                    | 0.020                               | 11.52                 | 0              |
| Cu-In <sub>2</sub> O <sub>3-x</sub>    | 23.75                                   | 0.230                               | 38.76                 | 2.06           |
| Ru-In <sub>2</sub> O <sub>3-x</sub>    | 33.72                                   | 0.178                               | 32.71                 | 1.97           |
| Pt-In <sub>2</sub> O <sub>3-x</sub>    | 26.06                                   | 0.198                               | 30.36                 | 1.99           |
| Rh-In <sub>2</sub> O <sub>3-x</sub>    | 26.82                                   | 0.236                               | 35.23                 | 2.09           |
